# Supplementary material for: DNA polymerase ε-dependent modulation of the pausing property of the CMG helicase at the barrier
Source: PubMed Central journal article supplement — Genes Dev. 2018 Oct 1;32(19-20):1315–20. doi: 10.1101/gad.317073.118 (PMC6169835; doi:10.1101/gad.317073.118), 2018-10-01
Supplement: supp_gad.317073.118_Supplementary_Fig_S2.pdf [file supp_gad.317073.118_Supplementary_Fig_S2.pdf]

## Hizume Supplementary Fig. S2

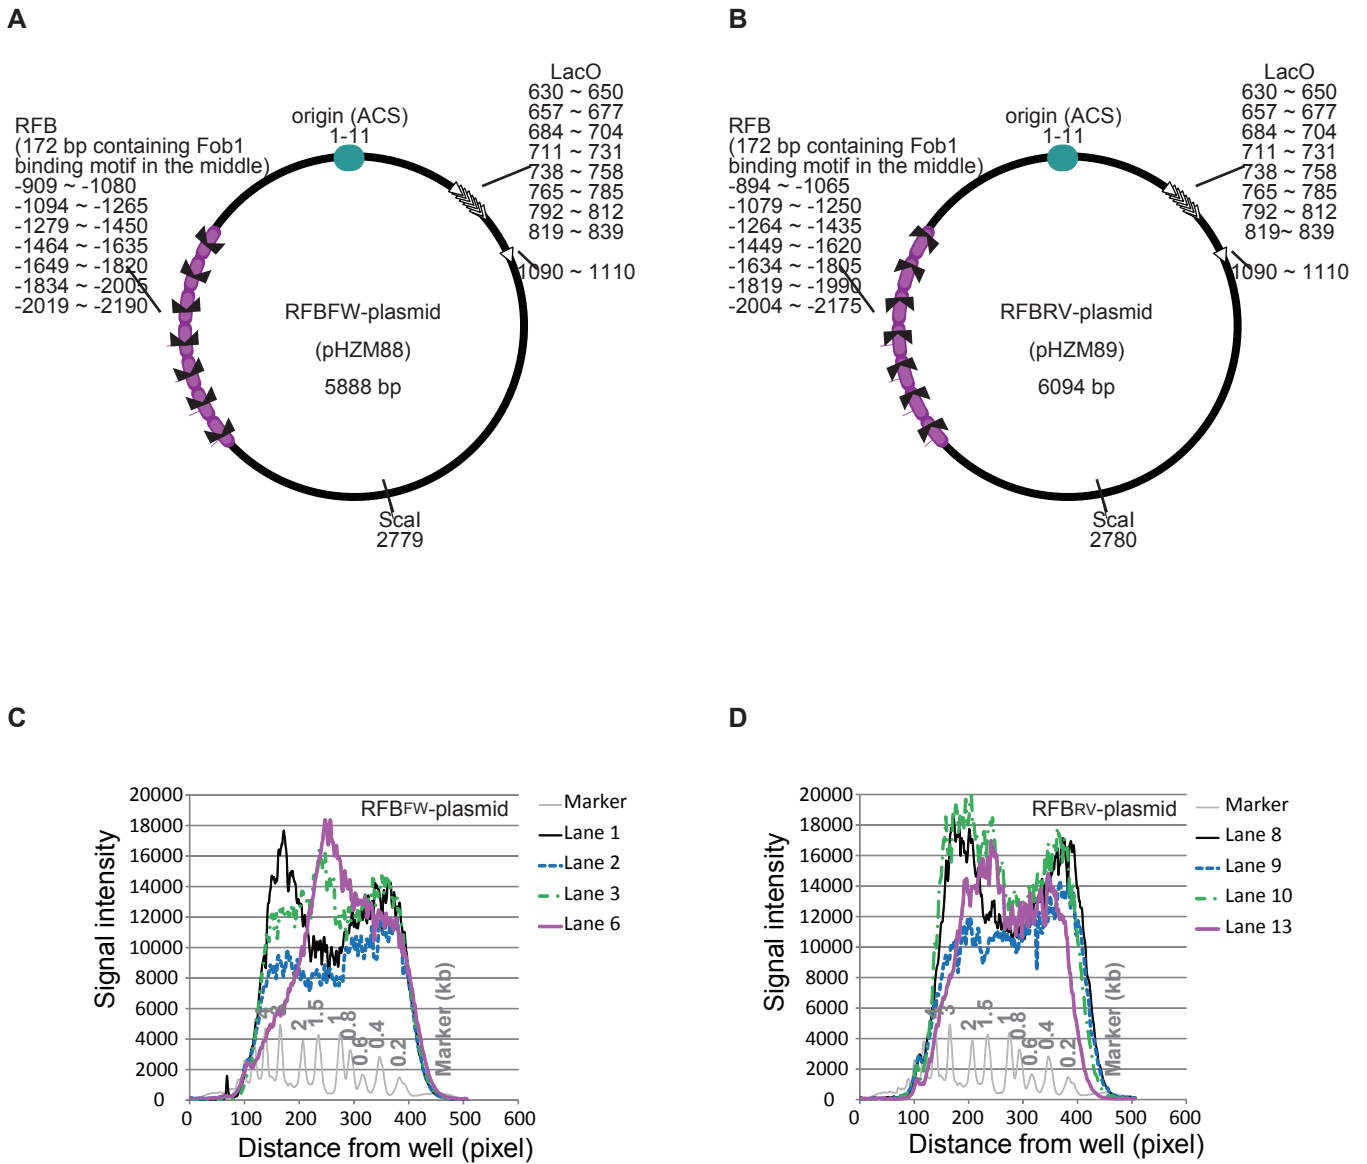

**Figure S2.** (A, B) Plasmid DNA used in the replication assay shown in Figs 1D and 2. Seven tandem repeats of the RFB were inserted to face their nonpermissive (A) or permissive (B) sides. (C, D) The intensity of the synthesized DNA in Fig. 1D was measured and plotted from the reaction using the RFB<sup>FW</sup> plasmid (C) or the RFB<sup>RV</sup> plasmid (D).
