# Supplementary material for: DNA polymerase ε-dependent modulation of the pausing property of the CMG helicase at the barrier
Source: PubMed Central journal article supplement — Genes Dev. 2018 Oct 1;32(19-20):1315–20. doi: 10.1101/gad.317073.118 (PMC6169835; doi:10.1101/gad.317073.118), 2018-10-01
Supplement: supp_gad.317073.118_Supplementary_Fig_S4.pdf [file supp_gad.317073.118_Supplementary_Fig_S4.pdf]

# Hizume Supplementary Fig. S4

**A**

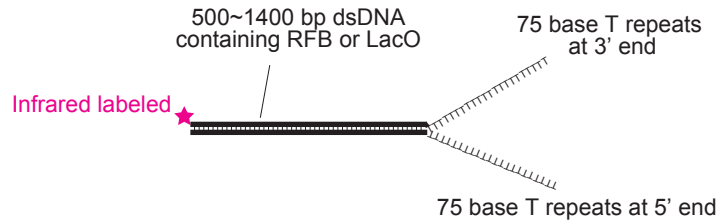

**B**

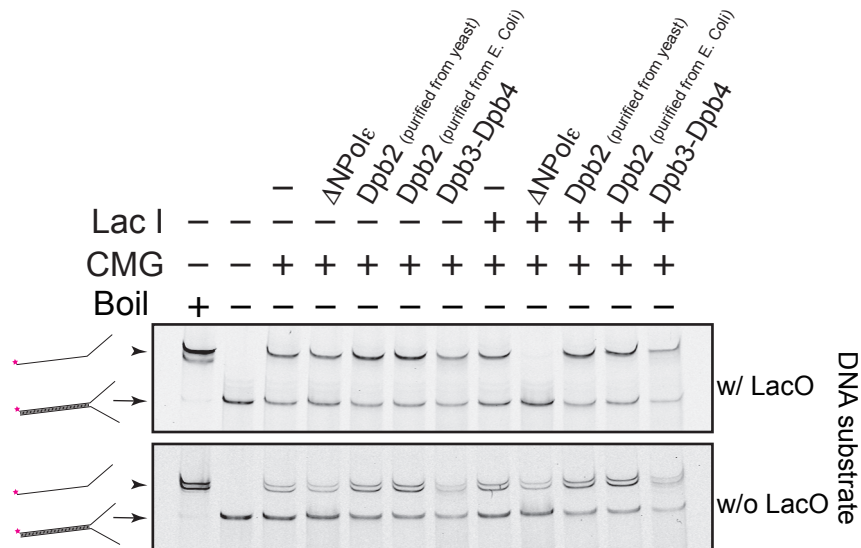

**Figure S4.** Helicase assay using a purified CMG complex. (A) DNA substrate used in the helicase assay. The forked DNA substrate was prepared via a ligation reaction using infrared-labeled dsDNA and the annealed short-forked DNA. (B) Effect of LacI on CMG helicase activity. Using a forked DNA substrate with (upper panel) or without (lower panel) the LacO repeat, the helicase assay was performed in the presence of LacI, the Pol $\epsilon$ -pol2 $\Delta$ N complex ( $\Delta$ NPoI $\epsilon$ ), Dpb2, and Dpb3-Dpb4, as indicated above the panels.
