# Supplementary material for: DNA polymerase ε-dependent modulation of the pausing property of the CMG helicase at the barrier
Source: PubMed Central journal article supplement — Genes Dev. 2018 Oct 1;32(19-20):1315–20. doi: 10.1101/gad.317073.118 (PMC6169835; doi:10.1101/gad.317073.118), 2018-10-01
Supplement: supp_gad.317073.118_Supplementary_Fig_S5.pdf [file supp_gad.317073.118_Supplementary_Fig_S5.pdf]

## Hizume Supplementary Fig. S5

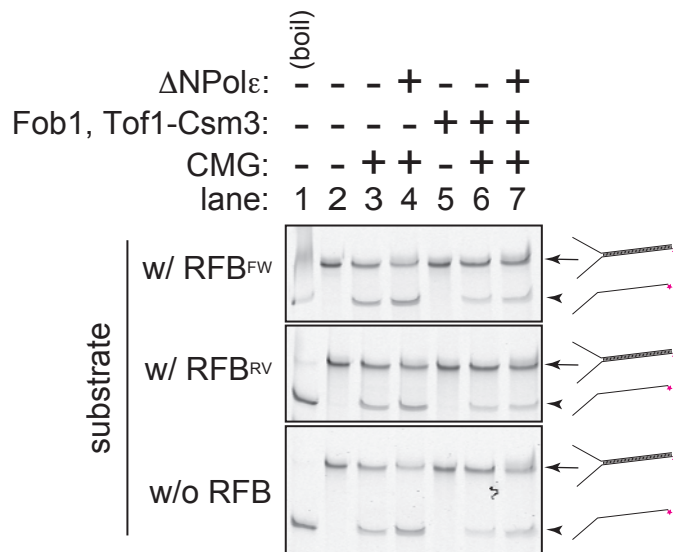

**Figure S5.** CMG helicase assay using a forked substrate containing the RFB. Using forked DNA substrates with RFB<sup>FW</sup>, RFB<sup>RV</sup>, or without the RFB (upper, middle, and lower panels, respectively), the helicase assay was performed in the presence of the Pol $\epsilon$ -pol2 $\Delta$ N complex ( $\Delta$ NPoI $\epsilon$ ), Fob1, and Tof1-Csm3, as indicated above the panels. CMG (100 fmol) was mixed with 1 fmol of the substrates and ATP in the presence of 128 fmol of Fob1, 64 fmol of Tof1-Csm3, and/or 100 fmol of  $\Delta$ NPoI $\epsilon$  complex. Regardless of the presence of the RFB on substrates, Fob1 and Tof1-Csm3 inhibited CMG helicase activity (compare lanes 3-4 with 6-7).  $\Delta$ NPoI $\epsilon$  had little effect on CMG helicase activity
